# Supplementary material for: How do patients pass through stroke services? Identifying stroke care pathways using national audit data
Source: PubMed Central journal article supplement (PMC7443957; doi:10.1177/0269215520907654), 2020-03-06
Supplement: Online_Appendix.pdf [file Online_Appendix.pdf]

## Appendix: All identified routes.

### Key to locations

RATa: Routinely Admitting Team with median length of stay  $\leq 7$  days

RATc: Routinely Admitting Team with median length of stay  $> 7$  days

NRAT: Non-Routinely Admitting Team

NAIT: Non Acute Inpatient Team

Home: Patient's own home

ESD/CRT: Early Supported Discharge / Community Rehab Team

Non-SSNAPESD/CRT: Non-SSNAP ESD/CRT

Non-SSNAPIn: Non-SSNAP Inpatient team (possibly a general inpatient ward)

"+E": discharged with an ESD team

"+C": discharged with a CRT team

"+EC": discharged with both a ESD and a CRT team

### Frequency:- Route

9520:- RATa; Home

9088:- RATc; Home

5853:- RATa; Died

5393:- RATc; Died

4838:- RATc; Home+C

3741:- RATa; Carehome

3603:- RATc; Carehome

3541:- RATa; Home+C

2813:- RATa; ESD/CRT+E; Home

2630:- RATc; ESD/CRT+E; Home

2589:- RATa; Home+E

2416:- RATc; Home+E

1738:- RATc; Home+EC

1672:- RATa; Elsewhere

1263:- RATa; NRAT; Home

1194:- RATc; Elsewhere

1147:- RATa; Home+EC

1049:- RATa; NRAT; Home+C

951:- RATa; NRAT; Died

944:- RATc; Carehome+C

904:- RATa; Elsewhere+C

867:- RATa; ESD/CRT+C; Home

849:- RATa; ESD/CRT+EC; Home

839:- RATa; Non-SSNAPIn

750:- RATa; NRAT; Carehome

615:- RATa; Carehome+C

601:- RATa; ESD/CRT+E

558:- RATc; ESD/CRT+C; Home

549:- RATc; ESD/CRT+EC; Home

548:- RATa; NAIT; Home+C

542:- RATa; NAIT; ESD/CRT+E; Home

537:- RATc; Elsewhere+C

468:- RATa; NAIT; Carehome

466:- RATc; Non-SSNAPIn

433:- RAta; NAIT; Home  
420:- RAtc; ESD/CRT+E  
418:- RAtc; Carehome+E  
417:- RAta; NRAT; ESD/CRT+E; Home  
412:- RAta; ESD/CRT+C  
401:- RAta; NRAT; Elsewhere  
337:- RAta; Non-SSNAPESD/CRT+E  
300:- RAta; NRAT; ESD/CRT+C; Home  
300:- RAta; Non-SSNAPIn+C  
290:- RAta; RAT; Home  
277:- RAta; NAIT; ESD/CRT+C; Home  
269:- RAta; NRAT; Home+E  
264:- RAtc; NAIT; Home  
259:- RAtc; NAIT; Home+C  
245:- RAta; ESD/CRT+EC  
235:- RAta; RAT; Died  
230:- RAta; ESD/CRT+E; Non-SSNAPESD/CRT  
228:- RAtc; Non-SSNAPIn+C  
222:- RAtc; ESD/CRT+C  
220:- RAtc; NAIT; ESD/CRT+E; Home  
215:- RAta; Carehome+EC  
214:- RAta; RAT; ESD/CRT+E; Home  
204:- RAtc; Carehome+EC  
201:- RAta; Non-SSNAPESD/CRT+C  
201:- RAtc; NAIT; ESD/CRT+C; Home  
199:- RAta; Elsewhere+E  
194:- RAta; RAT; Carehome  
192:- RAta; Carehome+E  
186:- RAta; NRAT; Carehome+C  
186:- RAta; NRAT; Home+EC  
176:- RAta; NAIT; Elsewhere  
175:- RAta; NAIT; Died  
166:- RAta; RAT; Home+C  
165:- RAtc; NAIT; Carehome  
157:- RAtc; ESD/CRT+E; Carehome  
153:- RAtc; Non-SSNAPESD/CRT+E  
149:- RAta; NAIT; Carehome+C  
149:- RAta; NRAT; ESD/CRT+E; ESD/CRT+C; Home  
148:- RAta; NAIT; ESD/CRT+E  
147:- NRATc; Died  
144:- RAta; NRAT; NRAT; Home  
138:- RAta; NAIT; Home+E  
137:- NRATc; Home  
134:- RAtc; ESD/CRT+E; ESD/CRT+C; Home  
129:- RAta; NRAT; ESD/CRT+EC; Home  
129:- RAtc; ESD/CRT+EC  
127:- RAtc; RAT; Home+C  
126:- RAta; Elsewhere+EC  
125:- RAtc; Elsewhere+E  
124:- RAta; NAIT; ESD/CRT+EC; Home  
124:- RAta; NRAT; NRAT; Carehome

122:- RATA; NRAT; Elsewhere+C  
117:- RATA; NRAT; NRAT; Died  
115:- RATA; NAIT; ESD/CRT+C  
108:- RATA; ESD/CRT+E; Elsewhere  
108:- RATA; NRAT; Non-SSNAPIn  
107:- RATA; NRAT; NAIT; ESD/CRT+C; Home  
106:- RATc; RAT; Home  
102:- RATc; Non-SSNAPESD/CRT+C  
101:- NRATc; Home+C  
96:- RATA; ESD/CRT+EC; Non-SSNAPESD/CRT  
93:- RATA; NRAT; ESD/CRT+E; ESD/CRT+EC; Home  
93:- RATc; Elsewhere+EC  
91:- RATc; NAIT; ESD/CRT+EC; Home  
88:- RATA; NAIT; Non-SSNAPIn  
85:- RATA; NRAT; NRAT; Home+C  
83:- RATA; Non-SSNAPESD/CRT+EC  
82:- RATA; NRAT; ESD/CRT+E  
81:- NRATc; Carehome  
79:- RATA; NRAT; ESD/CRT+C  
79:- RATc; ESD/CRT+E; Elsewhere  
77:- RATA; NRAT; ESD/CRT+EC  
75:- RATA; ESD/CRT+C; Carehome  
70:- RATA; RAT; Home+E  
70:- RATc; NAIT; Died  
69:- RATA; ESD/CRT+E; Carehome  
69:- RATA; NAIT; ESD/CRT+E; Carehome  
69:- RATc; RAT; Carehome  
68:- RATc; ESD/CRT+E; Died  
66:- RATA; ESD/CRT+E; ESD/CRT+C; Home  
66:- RATc; ESD/CRT+C; Carehome  
65:- RATA; NRAT; NAIT; Home+C  
65:- RATA; RAT; Elsewhere  
64:- RATA; NRAT; NRAT; Elsewhere  
61:- RATc; NRAT; Home+C  
61:- RATc; Non-SSNAPESD/CRT+EC  
59:- RATA; NRAT; NAIT; Carehome  
58:- NRATc; ESD/CRT+C; Home  
57:- RATA; NRAT; NRAT; ESD/CRT+C; Home  
57:- RATc; ESD/CRT+E; Non-SSNAPESD/CRT  
56:- NRATc; Elsewhere  
56:- RATc; NAIT; ESD/CRT+C  
56:- RATc; NAIT; Home+EC  
54:- RATc; RAT; Died  
53:- NRATc; ESD/CRT+E; Home  
53:- RATA; NRAT; Non-SSNAPESD/CRT+C  
52:- RATA; NAIT; Home+EC  
51:- RATA; RAT; ESD/CRT+E; ESD/CRT+C; Home  
51:- RATA; Non-SSNAPIn+E  
48:- RATA; NAIT; ESD/CRT+C; Carehome  
46:- RATA; NRAT; NAIT; Home  
46:- RATA; NRAT; Non-SSNAPESD/CRT+E

46:- RATc; NRAT; Carehome  
45:- RATA; NAIT; Non-SSNAPESD/CRT+C  
45:- RATA; NAIT; Elsewhere+C  
45:- RATA; NRAT; NRAT; Home+EC  
43:- RATA; NRAT; NRAT; ESD/CRT+E; Home  
43:- RATc; NAIT; Elsewhere  
42:- RATA; NAIT; Elsewhere+E  
41:- RATc; NAIT; Carehome+C  
41:- RATc; NAIT; Non-SSNAPIn  
40:- RATA; NAIT; ESD/CRT+EC  
40:- RATA; NRAT; ESD/CRT+E; ESD/CRT+C  
39:- RATA; ESD/CRT+E; ESD/CRT+C  
39:- RATA; RAT; ESD/CRT+C; Home  
39:- RATc; NRAT; Died  
38:- RATA; NRAT; Elsewhere+EC  
38:- RATA; RAT; Non-SSNAPIn  
37:- RATc; NAIT; ESD/CRT+E; Carehome  
37:- RATc; NRAT; Home  
37:- RATc; NRAT; Non-SSNAPIn  
37:- RATc; RAT; ESD/CRT+E; Home  
37:- RATc; Non-SSNAPIn+EC  
36:- RATA; ESD/CRT+C; Died  
36:- RATA; NRAT; Carehome+EC  
36:- RATA; NRAT; Non-SSNAPESD/CRT+EC  
36:- RATA; Non-SSNAPIn+EC  
35:- RATA; ESD/CRT+E; ESD/CRT+EC; Home  
35:- RATc; ESD/CRT+C; Died  
35:- RATc; ESD/CRT+EC; Carehome  
35:- RATc; RAT; Home+EC  
35:- RATc; Non-SSNAPESD/CRT  
34:- RATA; ESD/CRT+E; Died  
34:- RATA; ESD/CRT+EC; Carehome  
34:- RATA; RAT; Home+EC  
33:- RATA; NRAT; Non-SSNAPIn+EC  
33:- RATc; NRAT; ESD/CRT+C; Home  
32:- NAIT; Home  
32:- RATc; ESD/CRT+EC; Elsewhere  
31:- RATA; RAT; ESD/CRT+E  
31:- RATc; NRAT; ESD/CRT+E; Home  
31:- RATc; NRAT; ESD/CRT+EC; Home  
31:- RATc; Non-SSNAPIn+E  
30:- RATA; NAIT; ESD/CRT+E; Elsewhere  
30:- RATA; NRAT; ESD/CRT+EC; ESD/CRT+EC; Home  
29:- RATA; NRAT; NAIT; ESD/CRT+C  
28:- NRATc; Home+E  
28:- RATA; NRAT; ESD/CRT+C; Carehome  
27:- NRATc; Carehome+C  
27:- RATA; NAIT; Carehome+EC  
27:- RATA; NRAT; NAIT; Non-SSNAPIn  
27:- RATc; NRAT; Carehome+C  
26:- RATA; NRAT; ESD/CRT+E; Elsewhere

26:- RATa; NRAT; NRAT; ESD/CRT+EC; Home  
26:- RATc; NRAT; ESD/CRT+C  
25:- RATa; ESD/CRT+C; Elsewhere  
25:- RATa; NRAT; ESD/CRT+C; Died  
25:- RATa; NRAT; Non-SSNAPIn+C  
25:- RATa; RAT; Carehome+C  
25:- RATa; RAT; NAIT; ESD/CRT+E; Home  
25:- RATa; RAT; Elsewhere+C  
25:- RATc; NAIT; ESD/CRT+EC  
24:- RATa; NAIT; ESD/CRT+E; ESD/CRT+C  
23:- RATa; NAIT; Carehome+E  
23:- RATa; NRAT; NRAT; ESD/CRT+E  
23:- RATa; RAT; ESD/CRT+EC; Home  
23:- RATc; NRAT; Non-SSNAPESD/CRT+C  
23:- RATc; RAT; Elsewhere  
22:- NRATc; Home+EC  
22:- RATa; NRAT; ESD/CRT+E; ESD/CRT+EC  
22:- RATa; NRAT; NRAT; Carehome+C  
22:- RATc; RAT; Home+E  
21:- NRATc; ESD/CRT+E; ESD/CRT+C; Home  
21:- RATa; ESD/CRT+EC; ESD/CRT+EC  
21:- RATa; RAT; ESD/CRT+E; Carehome  
21:- RATa; Non-SSNAPESD/CRT  
21:- RATc; ESD/CRT+C; Elsewhere  
21:- RATc; NAIT; ESD/CRT+C; Carehome  
21:- RATc; RAT; Carehome+C  
20:- NAIT; Died  
20:- RATa; NAIT; ESD/CRT+E; Non-SSNAPESD/CRT  
20:- RATc; ESD/CRT+E; ESD/CRT+C  
19:- RATa; ESD/CRT+EC; Died  
19:- RATa; NRAT; NRAT; Home+E  
19:- RATc; ESD/CRT+E; ESD/CRT+EC  
18:- NRATc; ESD/CRT+EC; Home  
18:- RATa; NRAT; ESD/CRT+C; Elsewhere  
17:- NAIT; ESD/CRT+C; Home  
17:- RATa; ESD/CRT+EC; Elsewhere  
17:- RATa; NAIT; Elsewhere+EC  
17:- RATa; NRAT; NAIT; ESD/CRT+C; Carehome  
17:- RATa; NRAT; NAIT; Non-SSNAPESD/CRT+C  
17:- RATa; NRAT; Elsewhere+E  
17:- RATa; RAT; NAIT; Home+C  
17:- RATc; ESD/CRT+EC; Died  
17:- RATc; ESD/CRT+EC; Non-SSNAPESD/CRT  
17:- RATc; NAIT; Home+E  
16:- RATa; NAIT; ESD/CRT+EC; Non-SSNAPESD/CRT  
16:- RATa; NRAT; NRAT; Carehome+EC  
16:- RATa; RAT; ESD/CRT+E; Non-SSNAPESD/CRT  
15:- RATa; ESD/CRT+C; Non-SSNAPESD/CRT  
15:- RATa; NAIT; ESD/CRT+C; Died  
15:- RATa; NAIT; Non-SSNAPESD/CRT+E  
15:- RATa; NRAT; ESD/CRT+E; Carehome

15:- RATA; NRAT; NRAT; ESD/CRT+C  
15:- RATA; NRAT; NRAT; ESD/CRT+E; ESD/CRT+C; Home  
15:- RATA; NRAT; RAT; Died  
15:- RATc; NAIT; Carehome+EC  
15:- RATc; NAIT; Elsewhere+E  
14:- RATA; NRAT; NAIT; Elsewhere  
14:- RATA; NRAT; NRAT; Non-SSNAPIn  
14:- RATA; RAT; ESD/CRT+C  
14:- RATA; RAT; ESD/CRT+C; Carehome  
14:- RATc; ESD/CRT+E; ESD/CRT+EC; Home  
13:- RATA; ESD/CRT+EC; ESD/CRT+EC; Home  
13:- RATA; NAIT; ESD/CRT+C; Elsewhere  
13:- RATA; NRAT; NAIT; Died  
13:- RATA; RAT; Carehome+E  
13:- RATA; RAT; ESD/CRT+E; Died  
13:- RATA; RAT; ESD/CRT+E; Elsewhere  
13:- RATc; RAT; Elsewhere+C  
12:- RATA; NRAT; ESD/CRT+EC; ESD/CRT+C; Home  
12:- RATA; NRAT; NAIT; Carehome+C  
12:- RATA; NRAT; NAIT; ESD/CRT+E; ESD/CRT+EC; Home  
12:- RATA; NRAT; NAIT; Home+EC  
12:- RATA; NRAT; NRAT; ESD/CRT+EC  
12:- RATA; NRAT; NRAT; Elsewhere+C  
12:- RATA; NRAT; RAT; Home  
12:- RATA; RAT; NAIT; Home  
12:- RATc; ESD/CRT+EC; ESD/CRT+C; Home  
11:- RATA; ESD/CRT+E; ESD/CRT+EC  
11:- RATA; NAIT; ESD/CRT+E; ESD/CRT+C; Home  
11:- RATA; NAIT; Non-SSNAPIn+C  
11:- RATA; NRAT; ESD/CRT+E; Died  
11:- RATA; NRAT; NRAT; NAIT; ESD/CRT+C; Home  
11:- RATA; NRAT; NRAT; Elsewhere+EC  
11:- RATA; RAT; Carehome+EC  
11:- RATA; RAT; ESD/CRT+E; ESD/CRT+C  
11:- RATA; RAT; NAIT; ESD/CRT+C; Home  
11:- RATc; NAIT; Non-SSNAPESD/CRT+C  
11:- RATc; NAIT; Elsewhere+C  
11:- RATc; NRAT; Elsewhere  
10:- NAIT; Home  
10:- NRATc; Non-SSNAPIn  
10:- NRATc; Elsewhere+C  
10:- RATA; ESD/CRT+EC; ESD/CRT+C; Home  
10:- RATA; NAIT; RAT; Died  
10:- RATA; NRAT; Carehome+E  
10:- RATA; NRAT; NAIT; ESD/CRT+C; Died  
10:- RATA; NRAT; NRAT; ESD/CRT+E; ESD/CRT+C  
10:- RATc; NAIT; ESD/CRT+C; Elsewhere  
10:- RATc; RAT; ESD/CRT+E  
9:- NAIT; Home+C  
9:- NRATc; NAIT; Home+C  
9:- NRATc; RAT; Home

9:- NRATc; RAT; NRAT; Died  
9:- NRATc; Elsewhere+E  
9:- RATA; NRAT; ESD/CRT+C; ESD/CRT+C; Home  
9:- RATA; NRAT; NAIT; Elsewhere+C  
9:- RATA; NRAT; NRAT; NAIT; Carehome  
9:- RATA; NRAT; NRAT; Non-SSNAPESD/CRT+C  
9:- RATA; RAT; RAT; Home  
9:- RATA; RAT; Non-SSNAPESD/CRT+C  
9:- RATc; ESD/CRT+C; ESD/CRT+C; Home  
9:- RATc; NAIT; ESD/CRT+EC; Elsewhere  
9:- RATc; RAT; RAT; Home  
8:- NAIT; ESD/CRT+E; Home  
8:- NRATc; NAIT; ESD/CRT+C; Home  
8:- NRATc; RAT; NRAT; Home  
8:- RATA; NRAT; ESD/CRT+E; ESD/CRT+C; Elsewhere  
8:- RATA; NRAT; ESD/CRT+E; Non-SSNAPESD/CRT  
8:- RATA; NRAT; ESD/CRT+EC; Died  
8:- RATA; NRAT; ESD/CRT+EC; ESD/CRT+C  
8:- RATA; NRAT; ESD/CRT+EC; Non-SSNAPESD/CRT  
8:- RATA; NRAT; NRAT; ESD/CRT+E; ESD/CRT+EC; Home  
8:- RATA; NRAT; RAT; Elsewhere  
8:- RATA; RAT; ESD/CRT+C; Died  
8:- RATA; RAT; NAIT; Carehome  
8:- RATc; RAT; ESD/CRT+C; Home  
7:- NAIT; Carehome  
7:- NRATc; ESD/CRT+C  
7:- NRATc; ESD/CRT+E  
7:- NRATc; ESD/CRT+E; ESD/CRT+EC; Home  
7:- NRATc; RAT; NRAT; Home+E  
7:- RATA; NAIT; RAT; NAIT; ESD/CRT+C  
7:- RATA; NRAT; NAIT; ESD/CRT+E; Home  
7:- RATA; NRAT; NRAT; NAIT; Home+C  
7:- RATA; NRAT; RAT; ESD/CRT+E; Home  
7:- RATA; RAT; RAT; Non-SSNAPIn  
7:- RATA; RAT; RAT; Elsewhere  
7:- RATc; NAIT; ESD/CRT+E  
7:- RATc; NAIT; RAT; Died  
7:- RATc; RAT; ESD/CRT+EC; Home  
7:- RATc; RAT; NAIT; ESD/CRT+E; Home  
7:- RATc; RAT; NAIT; Home+C  
7:- RATc; RAT; Non-SSNAPIn  
6:- NAIT; Died  
6:- NRATc; NRAT; Died  
6:- NRATc; RAT; NRAT; Home+C  
6:- NRATc; Non-SSNAPESD/CRT+E  
6:- RATA; NAIT; ESD/CRT+E; Died  
6:- RATA; NAIT; ESD/CRT+EC; Carehome  
6:- RATA; NAIT; ESD/CRT+EC; Elsewhere  
6:- RATA; NAIT; RAT; NAIT; Carehome  
6:- RATA; NAIT; Non-SSNAPESD/CRT+EC  
6:- RATA; NRAT; ESD/CRT+EC; ESD/CRT+EC

6:- RATa; NRAT; NAIT; ESD/CRT+C; Elsewhere  
6:- RATa; NRAT; NAIT; Non-SSNAPESD/CRT+E  
6:- RATa; NRAT; NRAT; ESD/CRT+EC; ESD/CRT+EC; Home  
6:- RATa; NRAT; NRAT; NAIT; Home  
6:- RATa; NRAT; NRAT; Non-SSNAPESD/CRT+EC  
6:- RATa; NRAT; NRAT; Non-SSNAPIn+C  
6:- RATa; NRAT; RAT; Home+E  
6:- RATa; NRAT; Non-SSNAPIn+E  
6:- RATa; RAT; ESD/CRT+E; ESD/CRT+EC; Home  
6:- RATa; RAT; NAIT; ESD/CRT+EC; Home  
6:- RATa; RAT; NAIT; Non-SSNAPESD/CRT+C  
6:- RATa; RAT; RAT; Carehome  
6:- RATa; RAT; RAT; Died  
6:- RATa; RAT; Non-SSNAPESD/CRT+E  
6:- RATa; RAT; Non-SSNAPIn+C  
6:- RATc; ESD/CRT+E; ESD/CRT+C; Elsewhere  
6:- RATc; NAIT; ESD/CRT+C; Died  
6:- RATc; NAIT; ESD/CRT+E; Non-SSNAPESD/CRT  
6:- RATc; RAT; ESD/CRT+E; Non-SSNAPESD/CRT  
6:- RATc; RAT; NAIT; Home  
6:- RATc; RAT; RAT; Home+C  
5:- NAIT; ESD/CRT+E  
5:- NRATc; ESD/CRT+E; ESD/CRT+C  
5:- NRATc; RAT; NRAT; Home+EC  
5:- RATa; ESD/CRT+C; ESD/CRT+C; Home  
5:- RATa; NAIT; NAIT; Home+C  
5:- RATa; NAIT; RAT; Home  
5:- RATa; NAIT; RAT; NAIT; Elsewhere  
5:- RATa; NRAT; NAIT; ESD/CRT+EC; Home  
5:- RATa; NRAT; NRAT; NAIT; ESD/CRT+C  
5:- RATa; NRAT; NRAT; Non-SSNAPIn+EC  
5:- RATa; NRAT; RAT; Carehome  
5:- RATa; NRAT; RAT; Home+C  
5:- RATa; RAT; NAIT; Carehome+C  
5:- RATa; RAT; NAIT; ESD/CRT+C  
5:- RATa; RAT; NAIT; ESD/CRT+E; Carehome  
5:- RATa; RAT; RAT; Home+C  
5:- RATa; RAT; RAT; Home+E  
5:- RATc; RAT; NAIT; Carehome  
5:- RATc; RAT; RAT; Carehome  
5:- RATc; RAT; RAT; ESD/CRT+E; Home  
5:- RATc; RAT; Elsewhere+EC  
4:- NAIT; ESD/CRT+C  
4:- NRATc; ESD/CRT+C; Died  
4:- NRATc; ESD/CRT+EC; ESD/CRT+C; Home  
4:- NRATc; NAIT; Elsewhere  
4:- NRATc; RAT; NRAT; Carehome  
4:- NRATc; Non-SSNAPESD/CRT+C  
4:- RATa; NAIT; Non-SSNAPESD/CRT  
4:- RATa; NRAT; ESD/CRT+EC; Elsewhere  
4:- RATa; NRAT; NAIT; ESD/CRT+E; ESD/CRT+EC



4:- RATA; NRAT; NRAT; ESD/CRT+C; ESD/CRT+C; Home  
4:- RATA; NRAT; NRAT; Non-SSNAPESD/CRT+E  
4:- RATA; NRAT; Non-SSNAPESD/CRT  
4:- RATA; RAT; NAIT; Died  
4:- RATA; RAT; NAIT; Non-SSNAPIn  
4:- RATA; RAT; RAT; ESD/CRT+C; Home  
4:- RATA; RAT; RAT; ESD/CRT+E; Home  
4:- RATA; RAT; Elsewhere+EC  
4:- RATc; NAIT; ESD/CRT+EC; Carehome  
4:- RATc; NAIT; Non-SSNAPIn+C  
4:- RATc; NRAT; Non-SSNAPIn+C  
4:- RATc; RAT; Carehome+E  
4:- RATc; RAT; ESD/CRT+E; ESD/CRT+C; Home  
4:- RATc; RAT; ESD/CRT+EC  
4:- RATc; RAT; NAIT; Home+EC  
4:- RATc; RAT; Non-SSNAPIn+EC  
3:- NAIT; Elsewhere  
3:- NAIT; Home+C  
3:- NAIT; Home+E  
3:- NRATc; Carehome+E  
3:- NRATc; ESD/CRT+C; Carehome  
3:- NRATc; NRAT; Home  
3:- NRATc; RAT; NRAT; ESD/CRT+E; Home  
3:- RATA; ESD/CRT+E; ESD/CRT+E; Home  
3:- RATA; NAIT; ESD/CRT+C; ESD/CRT+EC  
3:- RATA; NAIT; ESD/CRT+C; Non-SSNAPESD/CRT  
3:- RATA; NAIT; ESD/CRT+E; ESD/CRT+EC; Home  
3:- RATA; NAIT; ESD/CRT+EC; Died  
3:- RATA; NAIT; NAIT; ESD/CRT+C; Home  
3:- RATA; NAIT; RAT; NAIT; Died  
3:- RATA; NAIT; RAT; NAIT; Home  
3:- RATA; NAIT; RAT; Elsewhere  
3:- RATA; NAIT; Non-SSNAPIn+E  
3:- RATA; NRAT; ESD/CRT+E; ESD/CRT+C; Carehome  
3:- RATA; NRAT; ESD/CRT+E; ESD/CRT+C; Died  
3:- RATA; NRAT; ESD/CRT+EC; Carehome  
3:- RATA; NRAT; NAIT; ESD/CRT+EC; ESD/CRT+EC; Home  
3:- RATA; NRAT; NAIT; NAIT; Home+EC  
3:- RATA; NRAT; NAIT; Non-SSNAPIn+C  
3:- RATA; NRAT; NRAT; Carehome+E  
3:- RATA; NRAT; NRAT; ESD/CRT+C; Carehome  
3:- RATA; NRAT; NRAT; ESD/CRT+C; Died  
3:- RATA; NRAT; NRAT; ESD/CRT+E; Elsewhere  
3:- RATA; NRAT; NRAT; ESD/CRT+EC; ESD/CRT+C  
3:- RATA; NRAT; RAT; ESD/CRT+C; Home  
3:- RATA; NRAT; RAT; ESD/CRT+EC; Home  
3:- RATA; NRAT; RAT; NRAT; Died  
3:- RATA; NRAT; RAT; NRAT; ESD/CRT+EC  
3:- RATA; RAT; NAIT; ESD/CRT+E; Non-SSNAPESD/CRT  
3:- RATA; RAT; NAIT; Home+EC  
3:- RATA; RAT; NAIT; Elsewhere

3:- RATA; RAT; NRAT; Died  
3:- RATA; RAT; Elsewhere+E  
3:- RATc; ESD/CRT+EC; ESD/CRT+EC; Home  
3:- RATc; NAIT; Carehome+E  
3:- RATc; NAIT; ESD/CRT+E; Elsewhere  
3:- RATc; NAIT; RAT; NAIT; Home+C  
3:- RATc; NAIT; Elsewhere+EC  
3:- RATc; NRAT; ESD/CRT+C; Died  
3:- RATc; RAT; ESD/CRT+C  
3:- RATc; RAT; ESD/CRT+E; Carehome  
3:- RATc; RAT; NAIT; ESD/CRT+C; Home  
3:- RATc; RAT; RAT; Died  
3:- RATc; RAT; RAT; ESD/CRT+E  
3:- RATc; RAT; RAT; Elsewhere  
3:- RATc; RAT; Non-SSNAPIn+C  
2:- NAIT; Carehome  
2:- NAIT; Home+E  
2:- NAIT; Carehome+C  
2:- NAIT; ESD/CRT+C; Carehome  
2:- NRATA; ESD/CRT+EC; Home  
2:- NRATA; NRAT; Home  
2:- NRATA; RAT; NRAT; Carehome  
2:- NRATc; Carehome+EC  
2:- NRATc; ESD/CRT+E; Died  
2:- NRATc; ESD/CRT+EC; ESD/CRT+C  
2:- NRATc; NAIT; ESD/CRT+C  
2:- NRATc; NAIT; Home  
2:- NRATc; NRAT; Carehome  
2:- NRATc; NRAT; Home+C  
2:- NRATc; NRAT; Elsewhere+EC  
2:- NRATc; RAT; ESD/CRT+E; Home  
2:- NRATc; RAT; NRAT; Carehome+C  
2:- NRATc; RAT; NRAT; Elsewhere+C  
2:- NRATc; RAT; NRAT; Elsewhere+E  
2:- NRATc; RAT; NRAT; Elsewhere  
2:- NRATc; Non-SSNAPIn+C  
2:- NRATc; Elsewhere+EC  
2:- RATA; ESD/CRT+C; ESD/CRT+C; Carehome  
2:- RATA; ESD/CRT+C; ESD/CRT+EC  
2:- RATA; ESD/CRT+C; ESD/CRT+EC; Home  
2:- RATA; ESD/CRT+E; ESD/CRT+C; Elsewhere  
2:- RATA; ESD/CRT+E; ESD/CRT+E  
2:- RATA; ESD/CRT+EC; ESD/CRT+C  
2:- RATA; ESD/CRT+EC; ESD/CRT+EC; Died  
2:- RATA; ESD/CRT+EC; ESD/CRT+EC; ESD/CRT+EC  
2:- RATA; NAIT; ESD/CRT+C; ESD/CRT+C  
2:- RATA; NAIT; ESD/CRT+C; ESD/CRT+C; Home  
2:- RATA; NAIT; ESD/CRT+EC; ESD/CRT+EC; Home  
2:- RATA; NAIT; NAIT; Carehome+C  
2:- RATA; NAIT; RAT; NAIT; ESD/CRT+E  
2:- RATA; NAIT; RAT; NAIT; ESD/CRT+E; ESD/CRT+C

2:- RATa; NAIT; RAT; NAIT; RAT; ESD/CRT+E  
2:- RATa; NAIT; RAT; NAIT; RAT; NAIT; Carehome  
2:- RATa; NAIT; Non-SSNAPIn+EC  
2:- RATa; NRAT; ESD/CRT+E; ESD/CRT+E; Home  
2:- RATa; NRAT; ESD/CRT+E; ESD/CRT+EC; Carehome  
2:- RATa; NRAT; NAIT; Carehome+EC  
2:- RATa; NRAT; NAIT; ESD/CRT+E; ESD/CRT+C; Home  
2:- RATa; NRAT; NAIT; ESD/CRT+E; Non-SSNAPESD/CRT  
2:- RATa; NRAT; NAIT; Home+E  
2:- RATa; NRAT; NAIT; NAIT; ESD/CRT+C  
2:- RATa; NRAT; NAIT; NAIT; Non-SSNAPIn  
2:- RATa; NRAT; NAIT; Non-SSNAPESD/CRT+EC  
2:- RATa; NRAT; NRAT; ESD/CRT+C; Elsewhere  
2:- RATa; NRAT; NRAT; ESD/CRT+E; Carehome  
2:- RATa; NRAT; NRAT; ESD/CRT+E; Died  
2:- RATa; NRAT; NRAT; ESD/CRT+E; Non-SSNAPESD/CRT  
2:- RATa; NRAT; NRAT; ESD/CRT+EC; ESD/CRT+EC  
2:- RATa; NRAT; NRAT; NAIT; ESD/CRT+C; Carehome  
2:- RATa; NRAT; NRAT; NAIT; Non-SSNAPESD/CRT+C  
2:- RATa; NRAT; NRAT; NAIT; Non-SSNAPIn  
2:- RATa; NRAT; NRAT; NAIT; Elsewhere  
2:- RATa; NRAT; NRAT; NRAT; Non-SSNAPIn  
2:- RATa; NRAT; NRAT; NRAT; Elsewhere+EC  
2:- RATa; NRAT; NRAT; Elsewhere+E  
2:- RATa; NRAT; RAT; Carehome+C  
2:- RATa; NRAT; RAT; NAIT; ESD/CRT+C; Home  
2:- RATa; NRAT; RAT; NAIT; Home+C  
2:- RATa; NRAT; RAT; NRAT; Carehome  
2:- RATa; NRAT; RAT; NRAT; NRAT; Died  
2:- RATa; NRAT; RAT; Elsewhere+C  
2:- RATa; RAT; ESD/CRT+C; Elsewhere  
2:- RATa; RAT; ESD/CRT+E; ESD/CRT+C; Elsewhere  
2:- RATa; RAT; ESD/CRT+E; ESD/CRT+E  
2:- RATa; RAT; ESD/CRT+E; ESD/CRT+EC  
2:- RATa; RAT; ESD/CRT+EC; Non-SSNAPESD/CRT  
2:- RATa; RAT; NAIT; ESD/CRT+E  
2:- RATa; RAT; NAIT; ESD/CRT+EC; Carehome  
2:- RATa; RAT; NAIT; ESD/CRT+EC; Elsewhere  
2:- RATa; RAT; NAIT; Home+E  
2:- RATa; RAT; NAIT; Elsewhere+C  
2:- RATa; RAT; NRAT; Home+C  
2:- RATa; RAT; NRAT; Elsewhere+C  
2:- RATa; RAT; RAT; Carehome+C  
2:- RATa; RAT; RAT; ESD/CRT+E; Non-SSNAPESD/CRT  
2:- RATa; RAT; RAT; ESD/CRT+EC; ESD/CRT+EC  
2:- RATa; RAT; RAT; Home+EC  
2:- RATa; RAT; RAT; NAIT; ESD/CRT+E; Home  
2:- RATa; RAT; RAT; NRAT; Home+EC  
2:- RATa; RAT; RAT; Non-SSNAPESD/CRT+E  
2:- RATa; RAT; RAT; Non-SSNAPIn+C  
2:- RATc; ESD/CRT+E; ESD/CRT+C; Carehome

2:- RATc; ESD/CRT+EC; ESD/CRT+C  
2:- RATc; ESD/CRT+EC; ESD/CRT+EC  
2:- RATc; NAIT; ESD/CRT+C; ESD/CRT+C  
2:- RATc; NAIT; NAIT; ESD/CRT+C; Home  
2:- RATc; NAIT; RAT; Carehome  
2:- RATc; NAIT; RAT; Elsewhere  
2:- RATc; NRAT; ESD/CRT+C; Carehome  
2:- RATc; NRAT; ESD/CRT+C; Elsewhere  
2:- RATc; NRAT; ESD/CRT+E  
2:- RATc; NRAT; ESD/CRT+E; ESD/CRT+C; Home  
2:- RATc; NRAT; ESD/CRT+EC  
2:- RATc; NRAT; Home+EC  
2:- RATc; NRAT; Non-SSNAPESD/CRT+EC  
2:- RATc; NRAT; Non-SSNAPESD/CRT  
2:- RATc; RAT; Carehome+EC  
2:- RATc; RAT; ESD/CRT+E; Died  
2:- RATc; RAT; ESD/CRT+EC; Carehome  
2:- RATc; RAT; ESD/CRT+EC; Elsewhere  
2:- RATc; RAT; NAIT; ESD/CRT+C; Carehome  
2:- RATc; RAT; NAIT; ESD/CRT+E  
2:- RATc; RAT; NAIT; ESD/CRT+EC; Home  
2:- RATc; RAT; NAIT; Non-SSNAPESD/CRT+C  
2:- RATc; RAT; NAIT; Non-SSNAPIn  
2:- RATc; RAT; RAT; ESD/CRT+EC; Home  
2:- RATc; RAT; RAT; Home+E  
2:- RATc; RAT; RAT; Non-SSNAPIn  
2:- RATc; RAT; RAT; Elsewhere+C  
2:- RATc; RAT; Non-SSNAPESD/CRT+EC  
2:- RATc; RAT; Non-SSNAPIn+E  
1:- NAIT; Carehome+EC  
1:- NAIT; Home+EC  
1:- NAIT; RAT; Home+E  
1:- NAIT; RAT; Home  
1:- NAIT; Elsewhere+E  
1:- NAIT; Elsewhere+EC  
1:- NAIT; Carehome+EC  
1:- NAIT; ESD/CRT+C; Elsewhere  
1:- NAIT; ESD/CRT+E; Carehome  
1:- NAIT; ESD/CRT+E; Died  
1:- NAIT; ESD/CRT+E; ESD/CRT+EC; Home  
1:- NAIT; ESD/CRT+E; Elsewhere  
1:- NAIT; ESD/CRT+EC; Home  
1:- NAIT; NRAT; NAIT; Home+C  
1:- NAIT; RAT; Carehome  
1:- NAIT; RAT; ESD/CRT+E; Elsewhere  
1:- NAIT; RAT; Home  
1:- NAIT; RAT; RAT; ESD/CRT+E; Home  
1:- NAIT; Elsewhere+C  
1:- NRATa; Carehome+EC  
1:- NRATa; Carehome  
1:- NRATa; Died

1:- NRATa; ESD/CRT+EC  
1:- NRATa; ESD/CRT+EC; Elsewhere  
1:- NRATa; Home+E  
1:- NRATa; Home  
1:- NRATa; NRAT; Carehome+C  
1:- NRATa; NRAT; ESD/CRT+E; ESD/CRT+EC  
1:- NRATa; NRAT; ESD/CRT+E; Home  
1:- NRATa; NRAT; ESD/CRT+EC; Elsewhere  
1:- NRATa; NRAT; Home+C  
1:- NRATa; NRAT; Home+E  
1:- NRATa; NRAT; Non-SSNAPESD/CRT+EC  
1:- NRATa; NRAT; Elsewhere  
1:- NRATa; RAT; NRAT; ESD/CRT+E; Home  
1:- NRATa; RAT; NRAT; ESD/CRT+EC; Elsewhere  
1:- NRATa; RAT; NRAT; Home  
1:- NRATa; RAT; NRAT; RAT; NRAT; Died  
1:- NRATa; RAT; Non-SSNAPIn  
1:- NRATa; Elsewhere  
1:- NRATc; ESD/CRT+C; ESD/CRT+EC; Home  
1:- NRATc; ESD/CRT+C; Non-SSNAPESD/CRT  
1:- NRATc; ESD/CRT+C; Elsewhere  
1:- NRATc; ESD/CRT+E; ESD/CRT+EC  
1:- NRATc; ESD/CRT+E; Elsewhere  
1:- NRATc; ESD/CRT+EC  
1:- NRATc; ESD/CRT+EC; ESD/CRT+EC; Home  
1:- NRATc; NAIT; Carehome  
1:- NRATc; NAIT; ESD/CRT+E; ESD/CRT+C  
1:- NRATc; NAIT; ESD/CRT+E; Home  
1:- NRATc; NRAT; ESD/CRT+C; Carehome  
1:- NRATc; NRAT; ESD/CRT+C; Home  
1:- NRATc; NRAT; ESD/CRT+E; ESD/CRT+C  
1:- NRATc; NRAT; ESD/CRT+EC; ESD/CRT+C; Died  
1:- NRATc; NRAT; ESD/CRT+EC; Home  
1:- NRATc; NRAT; Home+EC  
1:- NRATc; NRAT; Elsewhere+E  
1:- NRATc; NRAT; Elsewhere  
1:- NRATc; RAT; Died  
1:- NRATc; RAT; ESD/CRT+C; Carehome  
1:- NRATc; RAT; ESD/CRT+E  
1:- NRATc; RAT; Home+C  
1:- NRATc; RAT; NAIT; ESD/CRT+C; Home  
1:- NRATc; RAT; NRAT; Carehome+EC  
1:- NRATc; RAT; NRAT; ESD/CRT+C; Died  
1:- NRATc; RAT; NRAT; ESD/CRT+C; Home  
1:- NRATc; RAT; NRAT; ESD/CRT+E; ESD/CRT+C; Home  
1:- NRATc; RAT; NRAT; ESD/CRT+EC; Home  
1:- NRATc; RAT; NRAT; NAIT; Home+C  
1:- NRATc; RAT; NRAT; NRAT; Home+E  
1:- NRATc; RAT; RAT; ESD/CRT+E; Home  
1:- NRATc; RAT; Non-SSNAPESD/CRT+E  
1:- NRATc; Non-SSNAPESD/CRT+EC

1:- NRATc; Non-SSNAPESD/CRT  
1:- NRATc; Non-SSNAPIn+EC  
1:- RATA; ESD/CRT+C; ESD/CRT+C; ESD/CRT+EC; Home  
1:- RATA; ESD/CRT+C; ESD/CRT+C; Elsewhere  
1:- RATA; ESD/CRT+E; ESD/CRT+C; ESD/CRT+C; Home  
1:- RATA; ESD/CRT+E; ESD/CRT+C; ESD/CRT+E  
1:- RATA; ESD/CRT+E; ESD/CRT+E; Elsewhere  
1:- RATA; ESD/CRT+E; ESD/CRT+EC; Died  
1:- RATA; ESD/CRT+EC; ESD/CRT+EC; Elsewhere  
1:- RATA; Home+C; ESD/CRT; Home  
1:- RATA; NAIT; ESD/CRT+C; ESD/CRT+E  
1:- RATA; NAIT; ESD/CRT+C; ESD/CRT+EC; Home  
1:- RATA; NAIT; ESD/CRT+E; ESD/CRT+C; Carehome  
1:- RATA; NAIT; ESD/CRT+E; ESD/CRT+C; Died  
1:- RATA; NAIT; ESD/CRT+E; ESD/CRT+C; Non-SSNAPESD/CRT  
1:- RATA; NAIT; ESD/CRT+E; ESD/CRT+EC  
1:- RATA; NAIT; ESD/CRT+EC; ESD/CRT+C  
1:- RATA; NAIT; ESD/CRT+EC; ESD/CRT+C; Home  
1:- RATA; NAIT; NAIT; Carehome+EC  
1:- RATA; NAIT; NAIT; Carehome  
1:- RATA; NAIT; NAIT; Died  
1:- RATA; NAIT; NAIT; ESD/CRT+E; Home  
1:- RATA; NAIT; NAIT; ESD/CRT+EC  
1:- RATA; NAIT; NAIT; Home+EC  
1:- RATA; NAIT; NAIT; Home  
1:- RATA; NAIT; NAIT; RAT; Home  
1:- RATA; NAIT; NRAT; Died  
1:- RATA; NAIT; RAT; Carehome+E  
1:- RATA; NAIT; RAT; Carehome  
1:- RATA; NAIT; RAT; ESD/CRT+C; Carehome  
1:- RATA; NAIT; RAT; ESD/CRT+C; Home  
1:- RATA; NAIT; RAT; ESD/CRT+E; Home  
1:- RATA; NAIT; RAT; Home+EC  
1:- RATA; NAIT; RAT; NAIT; ESD/CRT+E; Home  
1:- RATA; NAIT; RAT; NAIT; RAT; NAIT; ESD/CRT+C  
1:- RATA; NAIT; RAT; NAIT; RAT; NAIT; RAT; NAIT; CarehomeN  
1:- RATA; NAIT; RAT; NRAT; NAIT; ESD/CRT+C  
1:- RATA; NAIT; RAT; NRAT; NAIT; Home  
1:- RATA; NAIT; RAT; Non-SSNAPIn+C  
1:- RATA; NRAT; ESD/CRT+C; ESD/CRT+C; Elsewhere  
1:- RATA; NRAT; ESD/CRT+C; ESD/CRT+E; Home  
1:- RATA; NRAT; ESD/CRT+C; Non-SSNAPESD/CRT  
1:- RATA; NRAT; ESD/CRT+E; ESD/CRT+C; ESD/CRT+C  
1:- RATA; NRAT; ESD/CRT+E; ESD/CRT+C; Non-SSNAPESD/CRT  
1:- RATA; NRAT; ESD/CRT+EC; ESD/CRT+C; Non-SSNAPESD/CRT  
1:- RATA; NRAT; ESD/CRT+EC; ESD/CRT+C; Elsewhere  
1:- RATA; NRAT; ESD/CRT+EC; ESD/CRT+EC; Died  
1:- RATA; NRAT; Home; ESD/CRT; Home  
1:- RATA; NRAT; NAIT; ESD/CRT+C; ESD/CRT+C; Home  
1:- RATA; NRAT; NAIT; ESD/CRT+C; ESD/CRT+E  
1:- RATA; NRAT; NAIT; ESD/CRT+E

1:- RATA; NRAT; NAIT; ESD/CRT+E; ESD/CRT+C  
1:- RATA; NRAT; NAIT; ESD/CRT+E; Elsewhere  
1:- RATA; NRAT; NAIT; ESD/CRT+EC; ESD/CRT+EC  
1:- RATA; NRAT; NAIT; ESD/CRT+EC; Elsewhere  
1:- RATA; NRAT; NAIT; NAIT; Carehome+C  
1:- RATA; NRAT; NAIT; NAIT; Carehome  
1:- RATA; NRAT; NAIT; NAIT; ESD/CRT+C; Home  
1:- RATA; NRAT; NAIT; NAIT; Home+C  
1:- RATA; NRAT; NAIT; NRAT; Carehome+C  
1:- RATA; NRAT; NAIT; NRAT; Carehome  
1:- RATA; NRAT; NAIT; RAT; Carehome+C  
1:- RATA; NRAT; NAIT; RAT; Carehome+E  
1:- RATA; NRAT; NAIT; RAT; Died  
1:- RATA; NRAT; NAIT; RAT; Home  
1:- RATA; NRAT; NAIT; RAT; NAIT; Carehome+EC  
1:- RATA; NRAT; NAIT; RAT; NAIT; Home  
1:- RATA; NRAT; NAIT; RAT; NRAT; NAIT; Elsewhere  
1:- RATA; NRAT; NRAT; ESD/CRT+C; Non-SSNAPESD/CRT  
1:- RATA; NRAT; NRAT; ESD/CRT+EC; ESD/CRT+C; Home  
1:- RATA; NRAT; NRAT; ESD/CRT+EC; ESD/CRT+EC; Carehome  
1:- RATA; NRAT; NRAT; ESD/CRT+EC; Non-SSNAPESD/CRT  
1:- RATA; NRAT; NRAT; NAIT; Carehome+C  
1:- RATA; NRAT; NRAT; NAIT; ESD/CRT+E; ESD/CRT+EC; Home  
1:- RATA; NRAT; NRAT; NAIT; ESD/CRT+E; Home  
1:- RATA; NRAT; NRAT; NAIT; ESD/CRT+EC; Home  
1:- RATA; NRAT; NRAT; NAIT; Home+EC  
1:- RATA; NRAT; NRAT; NAIT; Non-SSNAPESD/CRT+EC  
1:- RATA; NRAT; NRAT; NAIT; Non-SSNAPIn+C  
1:- RATA; NRAT; NRAT; NRAT; Carehome+E  
1:- RATA; NRAT; NRAT; NRAT; Died  
1:- RATA; NRAT; NRAT; NRAT; ESD/CRT+C; ESD/CRT+C  
1:- RATA; NRAT; NRAT; NRAT; ESD/CRT+E; ESD/CRT+EC; Home  
1:- RATA; NRAT; NRAT; NRAT; Home+C  
1:- RATA; NRAT; NRAT; NRAT; Home+EC  
1:- RATA; NRAT; NRAT; NRAT; Non-SSNAPIn+EC  
1:- RATA; NRAT; NRAT; RAT; Died  
1:- RATA; NRAT; NRAT; RAT; NRAT; ESD/CRT+E; Home  
1:- RATA; NRAT; NRAT; RAT; NRAT; Non-SSNAPIn  
1:- RATA; NRAT; RAT; Carehome+EC  
1:- RATA; NRAT; RAT; ESD/CRT+C  
1:- RATA; NRAT; RAT; ESD/CRT+C; Died  
1:- RATA; NRAT; RAT; ESD/CRT+E; Carehome  
1:- RATA; NRAT; RAT; ESD/CRT+E; ESD/CRT+C; Non-SSNAPESD/CRT  
1:- RATA; NRAT; RAT; ESD/CRT+EC; Non-SSNAPESD/CRT  
1:- RATA; NRAT; RAT; Home+EC  
1:- RATA; NRAT; RAT; NAIT; Carehome+C  
1:- RATA; NRAT; RAT; NAIT; Carehome+EC  
1:- RATA; NRAT; RAT; NAIT; ESD/CRT+E; Home  
1:- RATA; NRAT; RAT; NAIT; ESD/CRT+EC; Home  
1:- RATA; NRAT; RAT; NAIT; Home+EC  
1:- RATA; NRAT; RAT; NAIT; Home

1:- RATa; NRAT; RAT; NAIT; NAIT; Carehome  
1:- RATa; NRAT; RAT; NAIT; Non-SSNAPIn+EC  
1:- RATa; NRAT; RAT; NAIT; Elsewhere+C  
1:- RATa; NRAT; RAT; NRAT; ESD/CRT+C  
1:- RATa; NRAT; RAT; NRAT; ESD/CRT+C; Home  
1:- RATa; NRAT; RAT; NRAT; ESD/CRT+E; ESD/CRT+EC; Home  
1:- RATa; NRAT; RAT; NRAT; Home+EC  
1:- RATa; NRAT; RAT; NRAT; Home  
1:- RATa; NRAT; RAT; NRAT; NAIT; Carehome  
1:- RATa; NRAT; RAT; NRAT; NAIT; ESD/CRT+C  
1:- RATa; NRAT; RAT; NRAT; NAIT; Home+C  
1:- RATa; NRAT; RAT; NRAT; NAIT; Non-SSNAPIn  
1:- RATa; NRAT; RAT; NRAT; NRAT; Carehome+C  
1:- RATa; NRAT; RAT; NRAT; NRAT; Non-SSNAPIn  
1:- RATa; NRAT; RAT; NRAT; NRAT; Elsewhere  
1:- RATa; NRAT; RAT; NRAT; RAT; NRAT; Carehome  
1:- RATa; NRAT; RAT; NRAT; Non-SSNAPIn  
1:- RATa; NRAT; RAT; NRAT; Elsewhere  
1:- RATa; NRAT; RAT; Non-SSNAPESD/CRT  
1:- RATa; NRAT; RAT; Non-SSNAPIn+C  
1:- RATa; NRAT; RAT; Non-SSNAPIn  
1:- RATa; RAT; ESD/CRT+E; ESD/CRT+C; Died  
1:- RATa; RAT; ESD/CRT+E; ESD/CRT+C; ESD/CRT+C; Home  
1:- RATa; RAT; ESD/CRT+E; ESD/CRT+C; Non-SSNAPESD/CRT  
1:- RATa; RAT; ESD/CRT+EC; ESD/CRT+C; Home  
1:- RATa; RAT; ESD/CRT+EC; ESD/CRT+EC; Home  
1:- RATa; RAT; NAIT; ESD/CRT+C; Elsewhere  
1:- RATa; RAT; NAIT; RAT; NAIT; ESD/CRT+E; Home  
1:- RATa; RAT; NAIT; Non-SSNAPESD/CRT+EC  
1:- RATa; RAT; NAIT; Non-SSNAPIn+C  
1:- RATa; RAT; NAIT; Elsewhere+E  
1:- RATa; RAT; NAIT; Elsewhere+EC  
1:- RATa; RAT; NRAT; ESD/CRT+E; Died  
1:- RATa; RAT; NRAT; ESD/CRT+E; Home  
1:- RATa; RAT; NRAT; Home+EC  
1:- RATa; RAT; NRAT; Home  
1:- RATa; RAT; NRAT; NRAT; Home+EC  
1:- RATa; RAT; NRAT; NRAT; Home  
1:- RATa; RAT; NRAT; NRAT; NAIT; Home  
1:- RATa; RAT; NRAT; RAT; Died  
1:- RATa; RAT; NRAT; RAT; Home+C  
1:- RATa; RAT; NRAT; RAT; Non-SSNAPIn+C  
1:- RATa; RAT; NRAT; Non-SSNAPESD/CRT+E  
1:- RATa; RAT; NRAT; Non-SSNAPIn  
1:- RATa; RAT; NRAT; Elsewhere+EC  
1:- RATa; RAT; RAT; Carehome+E  
1:- RATa; RAT; RAT; ESD/CRT+C  
1:- RATa; RAT; RAT; ESD/CRT+E  
1:- RATa; RAT; RAT; ESD/CRT+E; Elsewhere  
1:- RATa; RAT; RAT; ESD/CRT+EC  
1:- RATa; RAT; RAT; ESD/CRT+EC; ESD/CRT+EC; Home



1:- RATa; RAT; RAT; ESD/CRT+EC; Home  
1:- RATa; RAT; RAT; ESD/CRT+EC; Elsewhere  
1:- RATa; RAT; RAT; NAIT; ESD/CRT+C  
1:- RATa; RAT; RAT; NAIT; ESD/CRT+EC; Home  
1:- RATa; RAT; RAT; NAIT; Home+C  
1:- RATa; RAT; RAT; NAIT; Home  
1:- RATa; RAT; RAT; NAIT; Non-SSNAPIn  
1:- RATa; RAT; RAT; NRAT; ESD/CRT+C; Non-SSNAPESD/CRT  
1:- RATa; RAT; RAT; NRAT; Home  
1:- RATa; RAT; RAT; NRAT; Elsewhere+EC  
1:- RATa; RAT; RAT; RAT; ESD/CRT+E; Elsewhere  
1:- RATa; RAT; RAT; Elsewhere+C  
1:- RATa; RAT; Non-SSNAPESD/CRT+EC  
1:- RATa; RAT; Non-SSNAPIn+E  
1:- RATa; RAT; Non-SSNAPIn+EC  
1:- RATa; Non-SSNAP; ESD/CRT; Home  
1:- RATc; ESD/CRT+C; ESD/CRT+C; Died  
1:- RATc; ESD/CRT+C; ESD/CRT+EC  
1:- RATc; ESD/CRT+C; ESD/CRT+EC; Home  
1:- RATc; ESD/CRT+C; Non-SSNAPESD/CRT  
1:- RATc; ESD/CRT+E; ESD/CRT+C; Died  
1:- RATc; ESD/CRT+E; ESD/CRT+E  
1:- RATc; ESD/CRT+E; ESD/CRT+E; Home  
1:- RATc; ESD/CRT+E; ESD/CRT+EC; Carehome  
1:- RATc; ESD/CRT+EC; ESD/CRT+C; Carehome  
1:- RATc; Home+E; Home+E  
1:- RATc; Home; Home  
1:- RATc; NAIT; ESD/CRT+C; Non-SSNAPESD/CRT  
1:- RATc; NAIT; ESD/CRT+E; Died  
1:- RATc; NAIT; ESD/CRT+E; ESD/CRT+C  
1:- RATc; NAIT; ESD/CRT+E; ESD/CRT+C; Home  
1:- RATc; NAIT; ESD/CRT+EC; Died  
1:- RATc; NAIT; NAIT; ESD/CRT+C  
1:- RATc; NAIT; NAIT; ESD/CRT+C; Carehome  
1:- RATc; NAIT; NRAT; Carehome+C  
1:- RATc; NAIT; NRAT; Home+C  
1:- RATc; NAIT; RAT; Carehome+C  
1:- RATc; NAIT; RAT; ESD/CRT+EC; Home  
1:- RATc; NAIT; RAT; Home  
1:- RATc; NAIT; RAT; NAIT; Home  
1:- RATc; NAIT; RAT; NAIT; Elsewhere  
1:- RATc; NAIT; Non-SSNAPESD/CRT  
1:- RATc; NAIT; Non-SSNAPIn+E  
1:- RATc; NAIT; Non-SSNAPIn+EC  
1:- RATc; NRAT; Carehome+E  
1:- RATc; NRAT; ESD/CRT+E; ESD/CRT+C  
1:- RATc; NRAT; Home+E  
1:- RATc; NRAT; NAIT; Died  
1:- RATc; NRAT; NAIT; ESD/CRT+C; Home  
1:- RATc; NRAT; RAT; Home+EC  
1:- RATc; NRAT; Non-SSNAPIn+E

1:- RATc; RAT; ESD/CRT+C; Carehome  
1:- RATc; RAT; ESD/CRT+C; ESD/CRT+C; Home  
1:- RATc; RAT; ESD/CRT+C; Elsewhere  
1:- RATc; RAT; ESD/CRT+E; ESD/CRT+C  
1:- RATc; RAT; ESD/CRT+EC; ESD/CRT+EC  
1:- RATc; RAT; NAIT; Carehome+C  
1:- RATc; RAT; NAIT; ESD/CRT+E; Carehome  
1:- RATc; RAT; NAIT; ESD/CRT+EC; Non-SSNAPESD/CRT  
1:- RATc; RAT; NAIT; Elsewhere  
1:- RATc; RAT; RAT; Carehome+C  
1:- RATc; RAT; RAT; ESD/CRT+C  
1:- RATc; RAT; RAT; ESD/CRT+C; Home  
1:- RATc; RAT; RAT; ESD/CRT+E; ESD/CRT+C; Home  
1:- RATc; RAT; RAT; ESD/CRT+EC; Carehome  
1:- RATc; RAT; RAT; Home+EC  
1:- RATc; RAT; RAT; NAIT; Home+C  
1:- RATc; RAT; RAT; NAIT; Home+EC  
1:- RATc; RAT; RAT; NAIT; Non-SSNAPESD/CRT+C  
1:- RATc; RAT; RAT; NAIT; Elsewhere  
1:- RATc; RAT; RAT; RAT; ESD/CRT+E; ESD/CRT+C; Home  
1:- RATc; RAT; RAT; Non-SSNAPESD/CRT+E  
1:- RATc; RAT; Non-SSNAPESD/CRT+C  
1:- RATc; RAT; Non-SSNAPESD/CRT+E  
1:- RATc; RAT; Elsewhere+E
