# Supplementary material for: How do patients pass through stroke services? Identifying stroke care pathways using national audit data
Source: PubMed Central journal article supplement (PMC7443957; doi:10.1177/0269215520907654), 2020-03-06
Supplement: Supplementary_Data_Costs_by_pathway_and_severity.pdf [file Supplementary_Data_Costs_by_pathway_and_severity.pdf]

**Supplementary Data. Costs of stroke care in each pathway, detailed by stroke severity .**

|           | <b>Stroke severity</b> | <b>No. of patients</b> | <b>% of independent patients at discharge (mRS &lt;=2)</b> | <b>Average cost of inpatient care/ patient (£)*</b> | <b>Average cost of community based therapy/ patient (£)*</b> | <b>Total average cost/ patient (£)</b> |
|-----------|------------------------|------------------------|------------------------------------------------------------|-----------------------------------------------------|--------------------------------------------------------------|----------------------------------------|
| Pathway 1 | mild                   | 7,498                  | 58.00                                                      | 2501.73                                             | 0.00                                                         | 2501.73                                |
| Pathway 1 | moderate               | 7978                   | 27.95                                                      | 4600.64                                             | 0.00                                                         | 4600.64                                |
| Pathway 1 | severe                 | 2833                   | 16.25                                                      | 5184.26                                             | 0.00                                                         | 5184.26                                |
| Pathway 1 | very severe            | 3337                   | 2.40                                                       | 4231.75                                             | 0.00                                                         | 4231.75                                |
| Pathway 1 | Overall                | 21,646                 | 26.15                                                      | 4129.60                                             | 0.00                                                         | 4129.60                                |
| Pathway 2 | mild                   | 43292                  | 18.68                                                      | 2949.71                                             | 0.00                                                         | 2949.71                                |
| Pathway 2 | moderate               | 86584                  | 21.35                                                      | 3371.10                                             | 0.00                                                         | 3371.10                                |
| Pathway 2 | severe                 | 173168                 | 24.40                                                      | 3852.68                                             | 0.00                                                         | 3852.68                                |
| Pathway 2 | very severe            | 2863                   | 2.46                                                       | 5642.34                                             | 0.00                                                         | 5642.34                                |
| Pathway 2 | Overall                | 305907                 | 16.72                                                      | 3953.96                                             | 0.00                                                         | 3953.96                                |
| Pathway 3 | mild                   | 7,895                  | 60.06                                                      | 2,502.88                                            | 331.32                                                       | 2,834.20                               |
| Pathway 3 | moderate               | 7,300                  | 42.33                                                      | 4,602.52                                            | 422.69                                                       | 5,025.21                               |
| Pathway 3 | severe                 | 1,229                  | 35.53                                                      | 5,184.26                                            | 315.51                                                       | 5,499.78                               |
| Pathway 3 | very severe            | 884                    | 12.68                                                      | 4,233.34                                            | 267.56                                                       | 4,500.90                               |

|           |             |        |       |          |        |          |
|-----------|-------------|--------|-------|----------|--------|----------|
| Pathway 3 | Overall     | 17,308 | 37.65 | 4,130.75 | 334.27 | 4,465.02 |
| Pathway 4 | mild        | 8,003  | 57.62 | 2,501.88 | 308.15 | 2,810.03 |
| Pathway 4 | moderate    | 6,908  | 40.94 | 4,601.93 | 295.46 | 4,897.40 |
| Pathway 4 | severe      | 1,307  | 17.60 | 5,185.07 | 289.74 | 5,474.81 |
| Pathway 4 | very severe | 1,032  | 8.31  | 5,646.90 | 245.62 | 5,892.51 |
| Pathway 4 | overall     | 17,250 | 31.12 | 4,483.94 | 284.74 | 4,768.69 |
| Pathway 5 | mild        | 1425   | 34.75 | 5887.67  | 0.00   | 5887.67  |
| Pathway 5 | moderate    | 2859   | 17.69 | 9283.41  | 0.00   | 9283.41  |
| Pathway 5 | severe      | 1080   | 5.31  | 9127.28  | 0.00   | 9127.28  |
| Pathway 5 | v severe    | 1115   | 3.08  | 6761.50  | 0.00   | 6761.50  |
| Pathway 5 | overall     | 6479   | 15.21 | 7764.97  | 0.00   | 7764.97  |
| Pathway 6 | mild        | 262    | 30.83 | 7238.43  | 0.00   | 7238.43  |
| Pathway 6 | moderate    | 466    | 20.40 | 10474.94 | 0.00   | 10474.94 |
| Pathway 6 | severe      | 190    | 4.84  | 8612.15  | 0.00   | 8612.15  |
| Pathway 6 | very severe | 149    | 7.06  | 7746.61  | 0.00   | 7746.61  |
| Pathway 6 | overall     | 1067   | 15.78 | 8518.03  | 0.00   | 8518.03  |

|           |             |       |       |         |         |          |
|-----------|-------------|-------|-------|---------|---------|----------|
| Pathway 7 | mild        | 2626  | 43.51 | 6161.47 | 722.54  | 6884.02  |
| Pathway 7 | moderate    | 3922  | 29.61 | 9480.80 | 829.95  | 10310.75 |
| Pathway 7 | severe      | 1041  | 12.89 | 9955.35 | 535.37  | 10490.71 |
| Pathway 7 | very severe | 821   | 8.52  | 6895.21 | 402.68  | 7297.89  |
| Pathway 7 | overall     | 8,410 | 23.63 | 8123.21 | 622.63  | 8745.84  |
| Pathway 8 | mild        | 501   | 38.98 | 7177.22 | 850.34  | 8027.56  |
| Pathway 8 | moderate    | 866   | 32.44 | 9988.87 | 651.38  | 10640.25 |
| Pathway 8 | severe      | 258   | 11.89 | 8281.75 | 674.76  | 8956.51  |
| Pathway 8 | very severe | 185   | 12.57 | 7677.77 | 469.43  | 8147.20  |
| Pathway 8 | overall     | 1810  | 23.97 | 8281.40 | 661.48  | 8942.88  |
| Pathway 9 | mild        | 466   | 47.44 | 2981.30 | 368.64  | 3349.94  |
| Pathway 9 | moderate    | 461   | 24.28 | 5327.40 | 355.11  | 5682.51  |
| Pathway 9 | severe      | 117   | 7.03  | 3503.18 | 311.64  | 3814.82  |
| Pathway 9 | very severe | 111   | 2.08  | 4460.85 | 1153.23 | 5614.08  |
| Pathway 9 | overall     | 1155  | 20.21 | 4068.18 | 547.16  | 4615.33  |
